# Supplementary material for: Highly sensitive strain sensors based on hollow packaged silver nanoparticle-decorated three-dimensional graphene foams for wearable electronics
Source: Royal Society of Chemistry journal article supplement (doi:10.1039/c9ra08118f), 2019-01-01
Supplement: c9ra08118f1.pdf [file c9ra08118f1.pdf]

## Supporting Information

### Highly Sensitive Strain Sensor Based on Hollow Packaged Silver Nanoparticles Decorated Three-Dimensional Graphene Foam for Wearable Electronics

Xinxiu Wu,<sup>a[+]</sup> Fangfang Niu,<sup>b[+]</sup> Ao Zhong,<sup>a</sup> Fei Han,<sup>c</sup> Yun Chen,<sup>d</sup> Jinhui Li,<sup>a\*</sup> Guoping Zhang,<sup>a\*</sup> Rong Sun,<sup>a</sup> Ching-Ping Wong<sup>e</sup>

<sup>a</sup>The Shenzhen International Innovation Institutes of Advanced Electronic Materials, Shenzhen Institutes of Advanced Technology, Chinese Academy of Sciences, Shenzhen 518055, China.

<sup>b</sup>Key Laboratory of Optoelectronic Devices and Systems of Ministry of Education and Guangdong Province, College of Physics and Optoelectronic Engineering, Shenzhen University, Shenzhen 518060, China.

<sup>c</sup>Academy for Engineering and Technology, Fudan University, Shanghai 200433, China.

<sup>d</sup>State Key Laboratory of Precision Electronic Manufacturing Technology and Equipment, Guangdong University of Technology, Guangzhou, 510006, China.

<sup>e</sup>School of Materials Science and Engineering, Georgia Institute of Technology, Georgia 30332, Atlanta.

Correspondence to: J. Li and G. Zhang (E-mail: [jh.li@siat.ac.cn](mailto:jh.li@siat.ac.cn); [gp.zhang@siat.ac.cn](mailto:gp.zhang@siat.ac.cn))

[+] These authors contributed equally to this work.

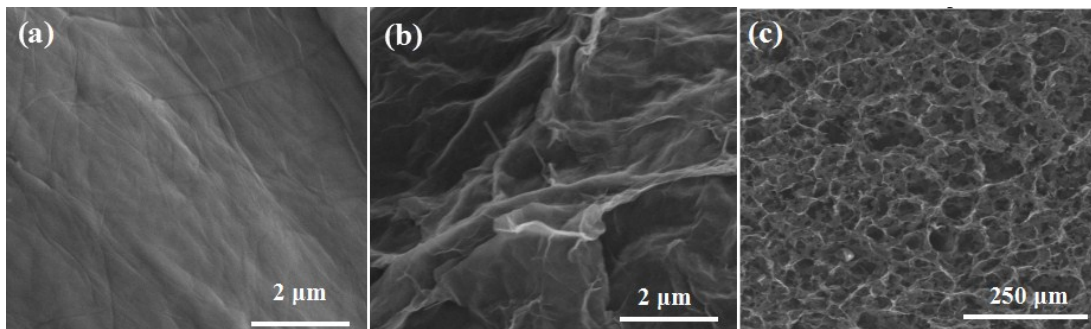

Figure S1. SEM images of GO (a) and (b-c) GF at different magnifications.

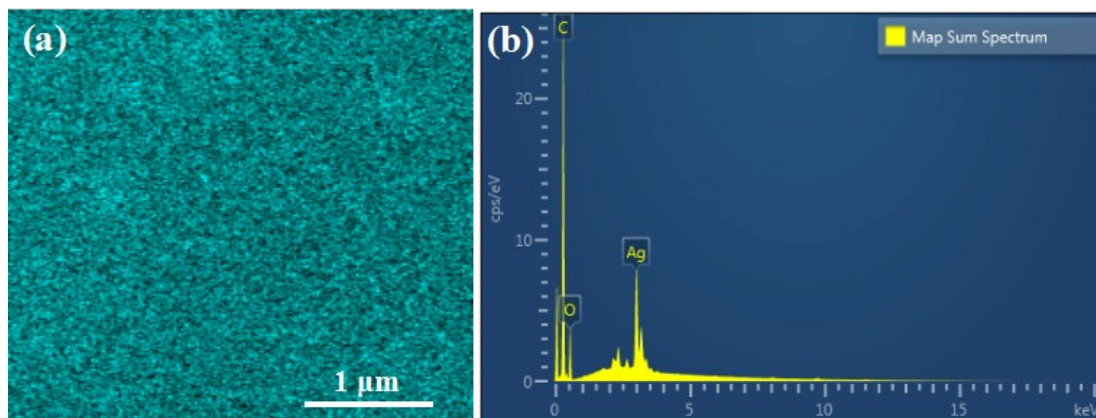

Figure S2. (a) Mapping diagram and (b) EDS diagram of GO decorated with silver nanoparticles.

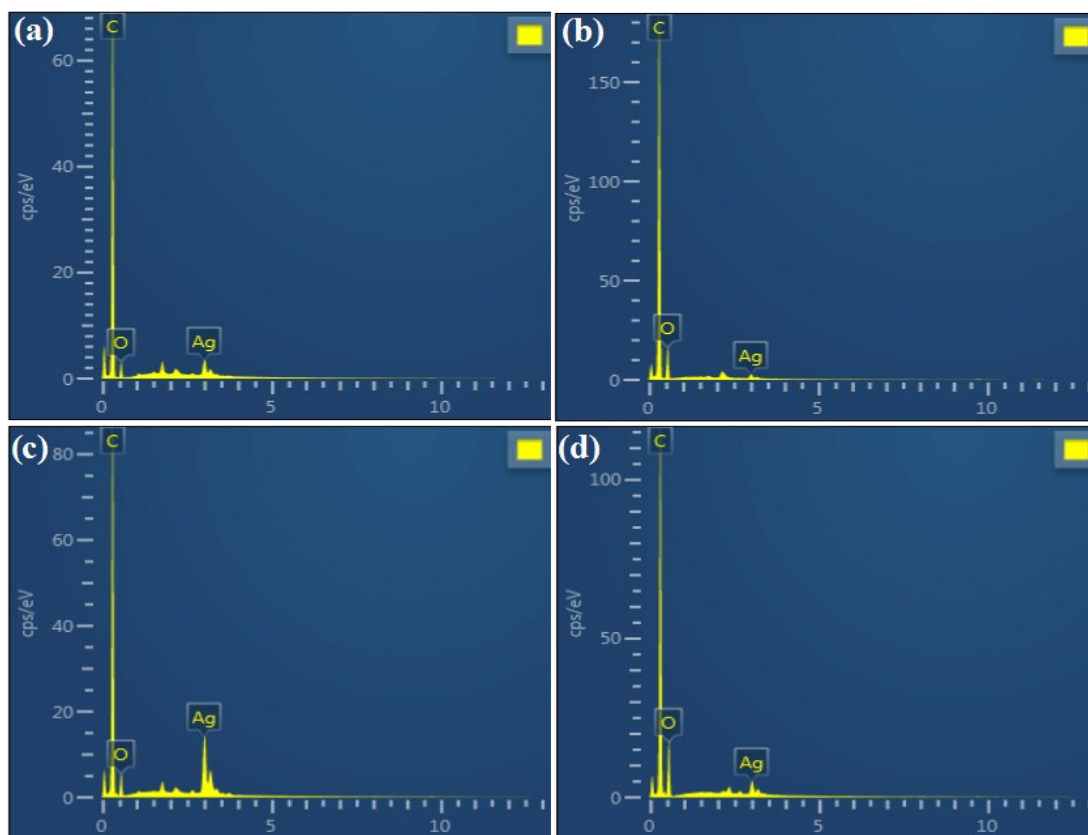

Figure S3. (a) EDS diagram of GF/Ag-1, (b) GF/Ag-2, (c) GF/Ag-3, (d) GF/Ag-4.

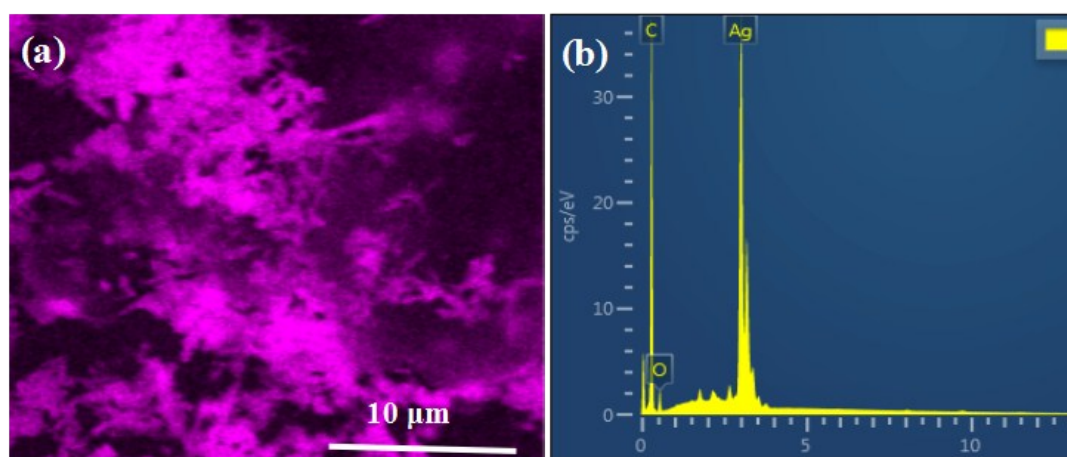

Figure S4. (a) Mapping diagram and (b) EDS diagram of GF/Ag-4 at the bottom part.

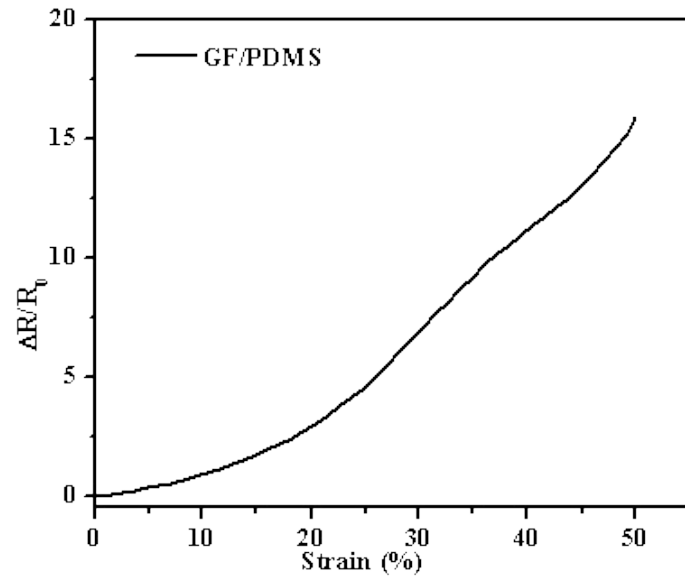

Figure S5. Curves of the relative resistance change versus strain for GF/PDMS sensor.
